# Supplementary material for: Surface rejuvenation of near-Earth asteroids triggered by planetary shadows
Source: Research Square preprint supplement (doi:10.21203/rs.3.rs-4899354/v1), 2024-09-24
Supplement: Supplementary file 1 [file 689b0409d7fcfb80423cf2ae.xlsx]

## Sheet: Sheet1
IAU number	Name	Designation	Semi-major axis (au)	Eccentricity	Inclination (deg)	SW parameter	# of shadow passages
719	Albert	A911 TB	2.63641	0.54699	2.80247	0.60456	0
1198	Atlantis	1931 RA	2.25028	0.33562	2.7258	0.749138	1
1566	Icarus	1949 MA	1.07808	0.82689	22.801	-0.295102	4
1620	Geographos	1951 RA	1.24569	0.335517	13.3361	0.431521	12
1685	Toro	1948 OA	1.36751	0.436073	9.3834	0.302976	3
1862	Apollo	1932 HA	1.47077	0.559879	6.35258	-0.156721	30
1864	Daedalus	1971 FA	1.46087	0.614403	22.2162	0.210069	1
1865	Cerberus	1971 UA	1.07992	0.466918	16.1021	0.433387	8
1916	Boreas	1953 RA	2.27223	0.449623	12.8816	0.437024	0
1943	Anteros	1973 EC	1.43064	0.255966	8.70689	0.645068	14
2063	Bacchus	1977 HB	1.07816	0.349446	9.43162	0.157322	30
2074	Shoemaker	1974 UA	1.79961	0.0818575	30.0795	0.518989	1
3102	Krok	1981 QA	2.15058	0.449582	8.4449	0.209183	0
3122	Florence	1981 ET3	1.76899	0.423149	22.1412	0.0775069	0
3198	Wallonia	1981 YH1	2.18094	0.23781	17.9632	0.315498	0
3288	Seleucus	1982 DV	2.03312	0.456151	5.93136	0.344907	1
3753	Cruithne	1986 TO	0.997766	0.514867	19.8015	-0.127565	13
4179	Toutatis	1989 AC	2.54415	0.624722	0.44816	0.116118	9
4197	Morpheus	1982 TA	2.29442	0.772367	12.6032	0.357936	3
4544	Xanthus	1989 FB	1.04199	0.250187	14.1446	0.57025	20
4688		1980 WF	2.23226	0.517923	6.37568	-0.397938	5
5011	Ptah	6743 P-L	1.63604	0.499974	7.40963	-0.195206	5
5143	Heracles	1991 VL	1.83527	0.771275	8.9818	-0.35275	2
5660		1974 MA	1.78545	0.762016	38.1315	-0.270847	5
5693		1993 EA	1.2706	0.585179	5.05877	0.0902508	28
5786	Talos	1991 RC	1.08149	0.826812	23.225	-0.240742	7
6047		1991 TB1	1.45452	0.351994	23.4754		1
6239	Minos	1989 QF	1.15104	0.412715	3.94071	0.17794	36
6585	O'Keefe	1984 SR	2.37151	0.358079	22.3664	0.490434	0
7341		1991 VK	1.84112	0.506056	5.4095	-0.0190684	9
18736		1998 NU	2.34996	0.490781	2.80581	0.499225	4
19356		1997 GH3	2.51137	0.558548	3.01507	0.294153	4
20429		1998 YN1	1.55643	0.464092	6.30151	0.534231	4
20790		2000 SE45	2.75208	0.555973	8.29386	0.753692	4
22753		1998 WT	1.21887	0.569861	3.20422	0.125036	13
22771		1999 CU3	1.57638	0.52389	11.4002	1.05543	10
23187		2000 PN9	1.84703	0.589236	51.3278	0.4658	7
24475		2000 VN2	1.97529	0.441289	14.6305	0.666192	0
25143	Itokawa	1998 SF36	1.32408	0.280277	1.62122	0.308193	42
31669		1999 JT6	2.13728	0.577594	9.53744	0.403599	2
35107		1991 VH	1.13729	0.144243	13.9111	0.164627	21
47581		2000 AN178	2.20612	0.267169	7.15994	0.419663	0
52340		1992 SY	2.21206	0.547397	8.0803	-0.265882	7
54690		2001 EB	1.62956	0.256264	35.3638	0.994846	2
65784	Naderayama	1995 UF4	2.24762	0.288778	4.97665	0.375296	0
65803	Didymos	1996 GT	1.64267	0.383265	3.41415	0.817728	12
66063		1998 RO1	0.990986	0.71996	22.6872	0.293868	13
66146		1998 TU3	0.787554	0.483775	5.40964	-0.0847801	59
85713		1998 SS49	1.92355	0.638574	10.7849	0.578661	7
85770		1998 UP1	0.99776	0.345125	33.1816	0.459571	15
86039		1999 NC43	1.75978	0.578803	7.13162	-0.117731	4
86212		1999 TG21	2.31608	0.310445	25.3416	0.721089	0
86324		1999 WA2	1.96679	0.434547	34.6002	0.675015	0
86819		2000 GK137	1.99577	0.505827	10.0621	0.132214	9
87024		2000 JS66	1.19663	0.189774	14.4348	0.514341	16
87684		2000 SY2	0.858631	0.642866	19.2246	-0.402081	19
90403		2003 YE45	1.23442	0.280145	19.0053	0.396926	16
98943		2001 CC21	1.03235	0.219156	4.80779	0.653069	22
99942	Apophis	2004 MN4	0.922722	0.191441	3.3393	0.258103	66
136993		1998 ST49	2.30819	0.595576	24.4881	0.129684	0
138258		2000 GD2	0.757773	0.476794	32.1368	0.102109	24
139622		2001 QQ142	1.42273	0.311246	9.31613	0.226259	15
142348		2002 RX211	2.06494	0.457646	6.0698	0.521329	8
144900		2004 VG64	0.968299	0.655641	36.2573	0.423837	7
144922		2005 CK38	2.13229	0.41257	8.23421	0.467286	1
152895		2000 CQ101	2.28836	0.494993	2.96971	0.420169	12
162058		1997 AE12	2.36681	0.55457	4.85085	-0.117857	0
162181		1999 LF6	1.4095	0.280586	18.9449	0.529551	2
162781		2000 XL44	2.22654	0.42604	10.0311	0.47339	2
184266		2004 VW14	2.12137	0.597501	3.8334	0.322961	6
200840		2001 XN254	2.32108	0.560815	1.94266	0.733232	8
230111		2001 BE10	0.823065	0.369205	17.5058	0.528824	28
285838		2001 FA1	1.88313	0.359474	33.8152	0.403852	0
302311		2002 AA	1.14781	0.302231	11.2756	0.583278	14
309214		2007 LL	0.980736	0.174047	10.0532	0.360465	25
310442		2000 CH59	0.862731	0.423205	3.25977	0.266072	47
345705		2006 VB14	0.767006	0.421154	31.0255	-0.286184	44
363075		2000 OG8	2.65957	0.547661	5.26562	0.51706	1
363814		2005 ND7	1.96405	0.482528	52.5735	0.55194	1
374851		2006 VV2	2.38609	0.60542	23.7319	0.586598	4
374855		2006 VQ13	1.09939	0.445691	16.6985	0.310533	14
402267		2005 QE166	2.74816	0.529697	12.9589	0.536508	1
408792		2000 GF2	1.34072	0.377405	9.63169	0.560952	7
423321		2005 ED318	1.85105	0.449324	2.3893	0.353825	17
428086		2006 NM	2.77976	0.616606	14.1974	0.567846	2
434096		2002 GO5	1.89588	0.767709	13.7691	0.401606	2
448003		2008 DE	1.71398	0.414055	14.7662	0.160295	12
467317		2000 QW7	1.94856	0.468992	4.15316	0.375423	4
481542		2007 RF5	1.06406	0.383556	31.92	0.416058	34
489337		2006 UM	2.23383	0.5393	15.8918	0.361857	0
503871		2000 SL	1.54034	0.39468	38.3511	0.548398	2
526670		2006 UL217	1.4302	0.348635	9.92346	0.562375	10
612856		2004 TP1	1.29127	0.389151	7.48984	0.424881	17
		2002 NY40	2.04996	0.708207	5.89414	-0.355912	2
		2006 BN55	1.87099	0.554238	18.6907	0.456219	10
		2007 DT103	2.20653	0.574846	5.45473	0.403188	2
		2008 CL1	0.961055	0.137451	30.0229	0.423205	1
